# Supplementary material
Source: MDPI journal article supplement (https://www.mdpi.com/1424-2818/14/1/49)
Supplement: s1 [file s1 › diversity-1556033-supplementary.pdf]

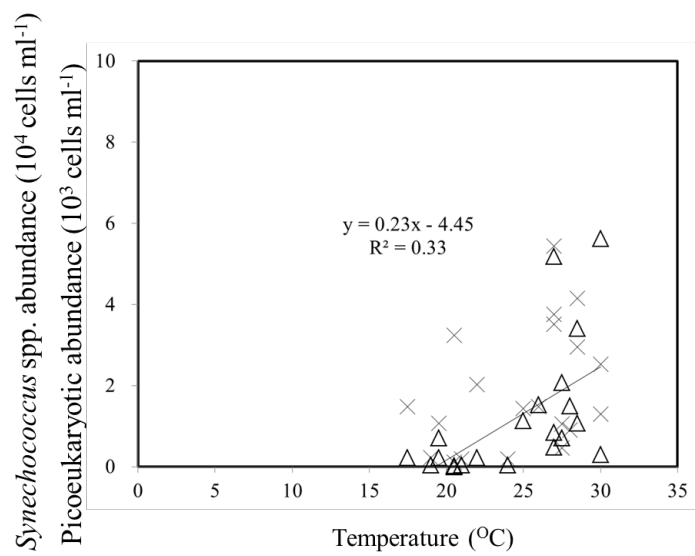

**Supplemental Figure S1.** Relationship between *Synechococcus* spp. (△) and picoeukaryotic abundance (x) and sea surface water temperature. Solid lines exhibit the fitted linear regressions
